# Supplementary material
Source: MDPI journal article supplement (https://www.mdpi.com/1996-1073/16/14/5282)
Supplement: s1 [file s1]

## Supplement:

### 1. Yield of switchgrass

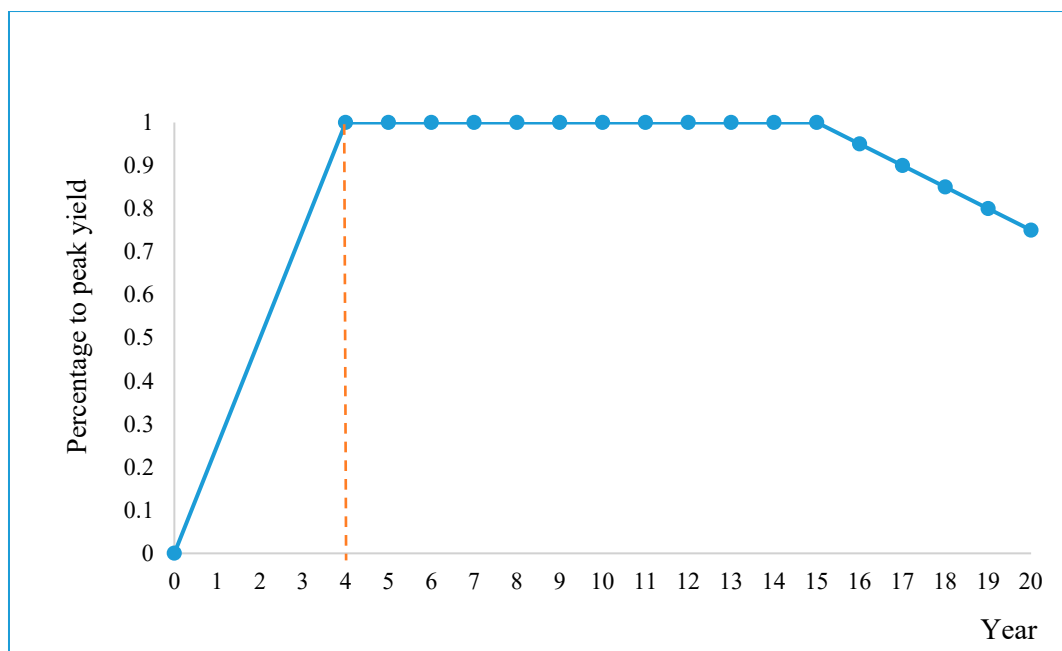

**Figure S1.** The dynamic yield of switchgrass during the 20-year life cycle of switchgrass. The switchgrass starts to accumulate biomass yield in the 0th year, and the yield reaches the peak in the 4th year. The peak yield remains constant until the 15th year and declines by 5% per year from the 15th year until the 20th year.

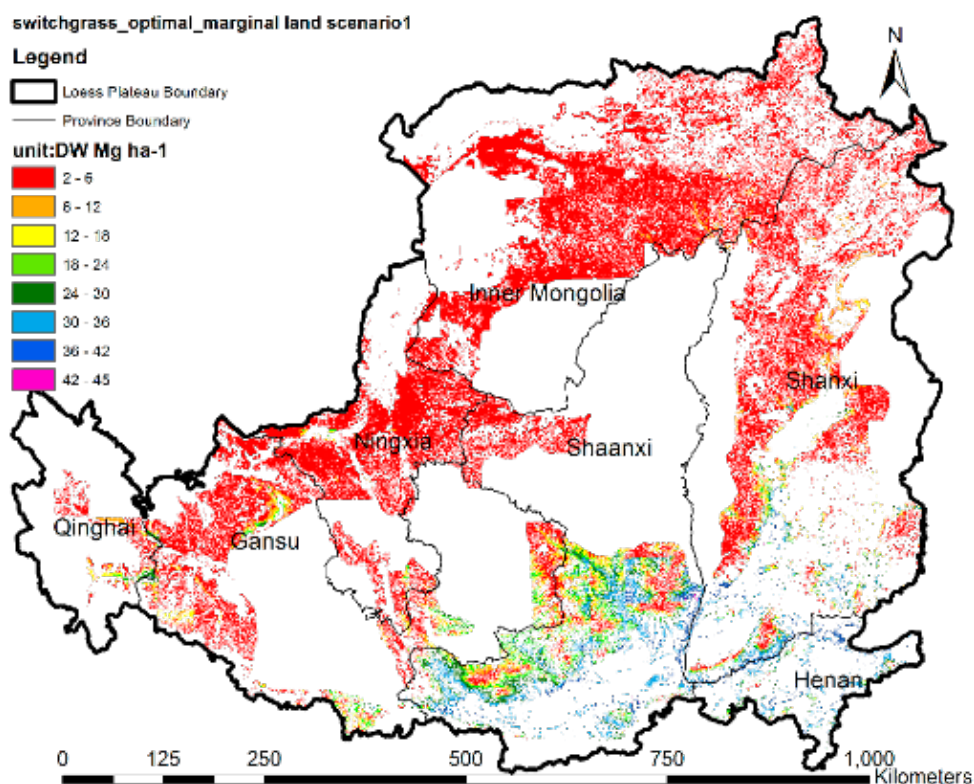

**Figure S2.** The spatially explicit yield of the peak yield of switchgrass on the marginal land of the Loess Plateau. The yield map was the optimal yield map derived from the research of Liu et al. [1]. In the Liu et al.'s research, the upland and lowland

switchgrass yields were estimated separately using a genotype-specific SwitchFor model and the optimal switchgrass yield distribution map was generated by comparing the upland and lowland switchgrass yields and extracting the higher yield in each 1 km<sup>2</sup> grid.

## 2. Land rent

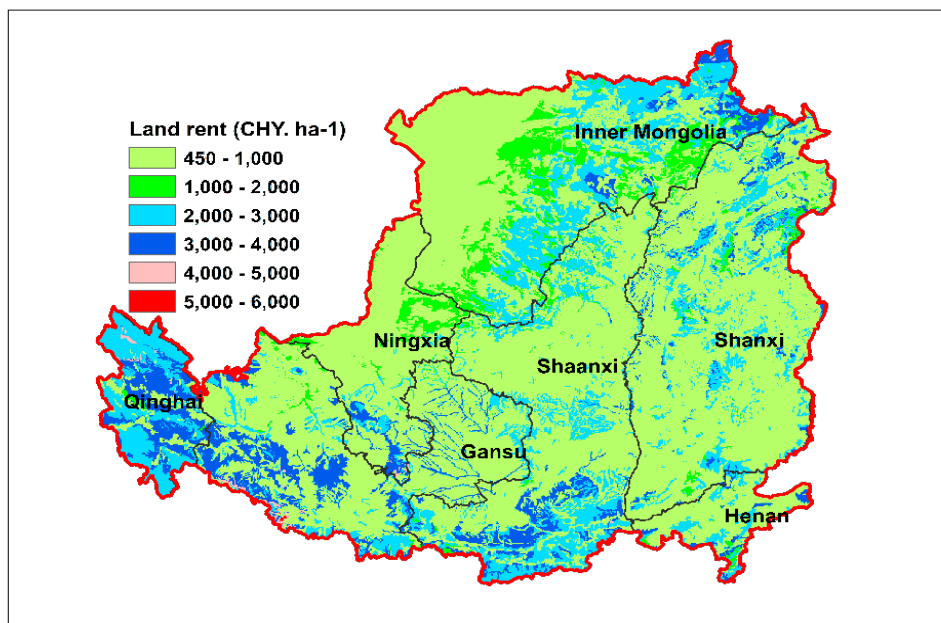

Figure S3. The spatially explicit rent of the marginal land.

## 3. Soil PH

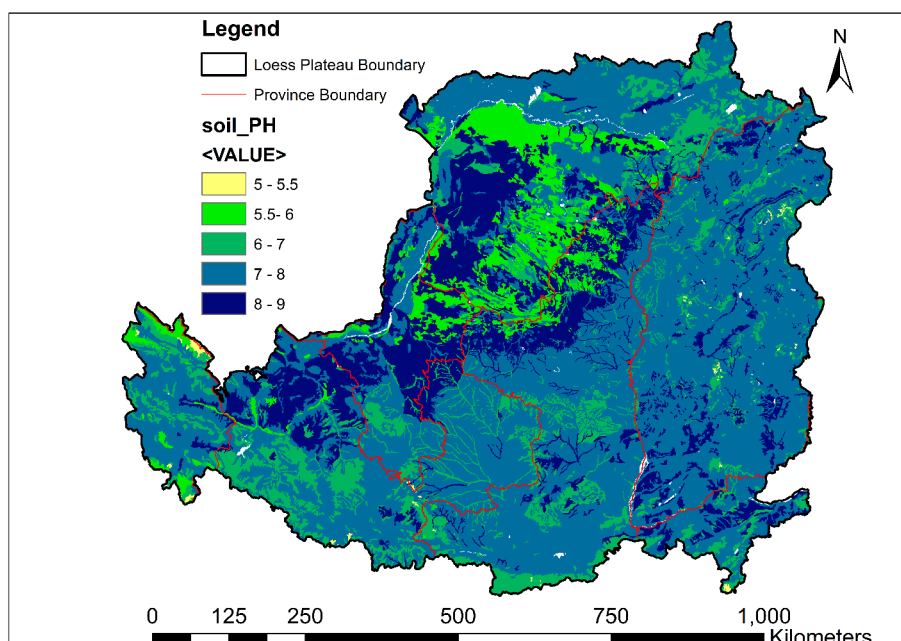

Figure S4. The spatially explicit of soil PH.

## 4. Soil P

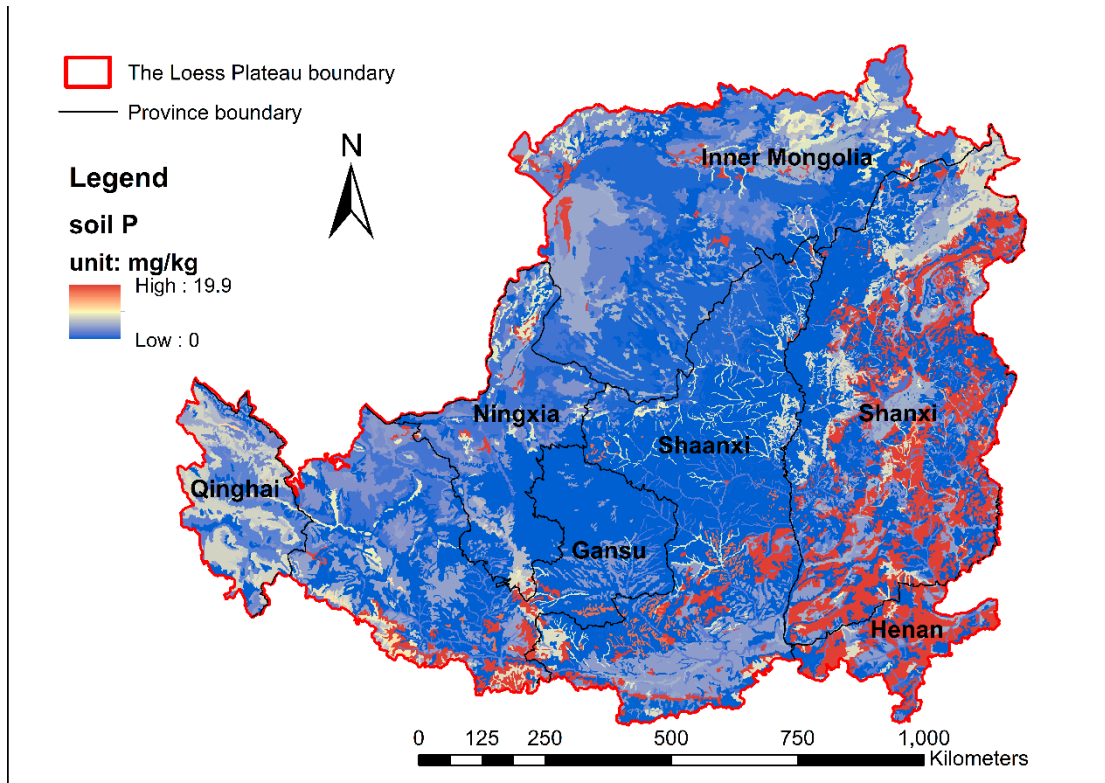

Figure S5. The spatially explicit of Soil P.

## 5. Soil K

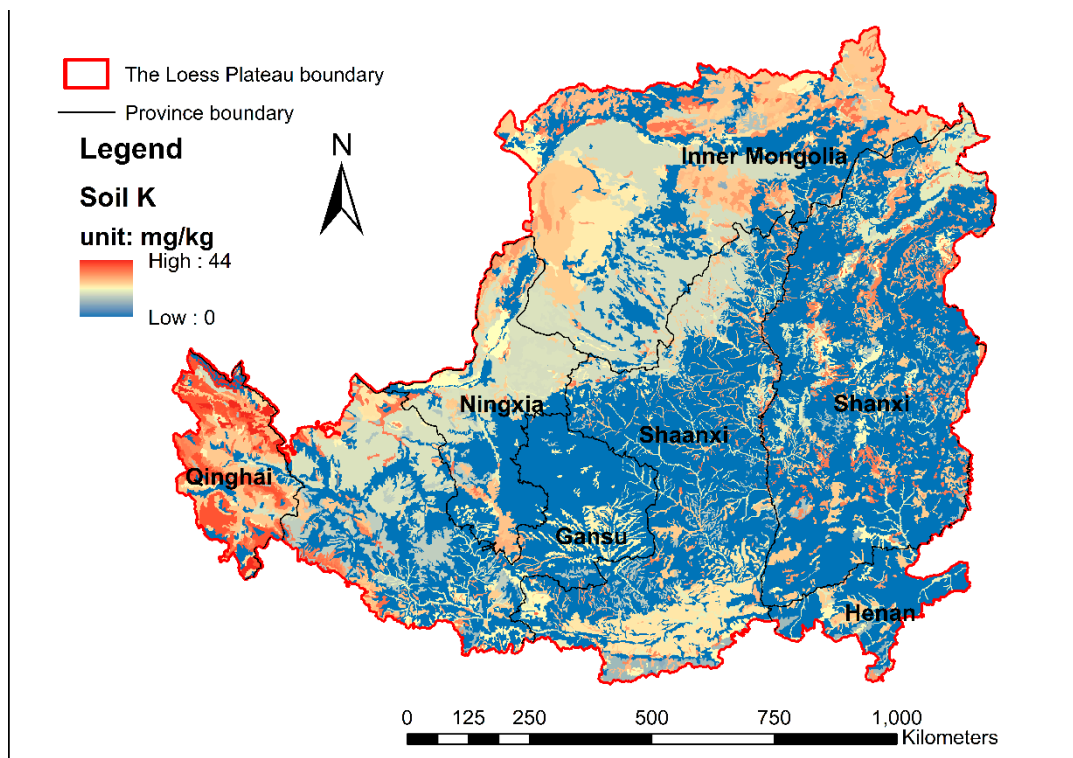

Figure S6. The spatially explicit of soil K.

## 6. Farm-gate feedstock production (FGFP) cost

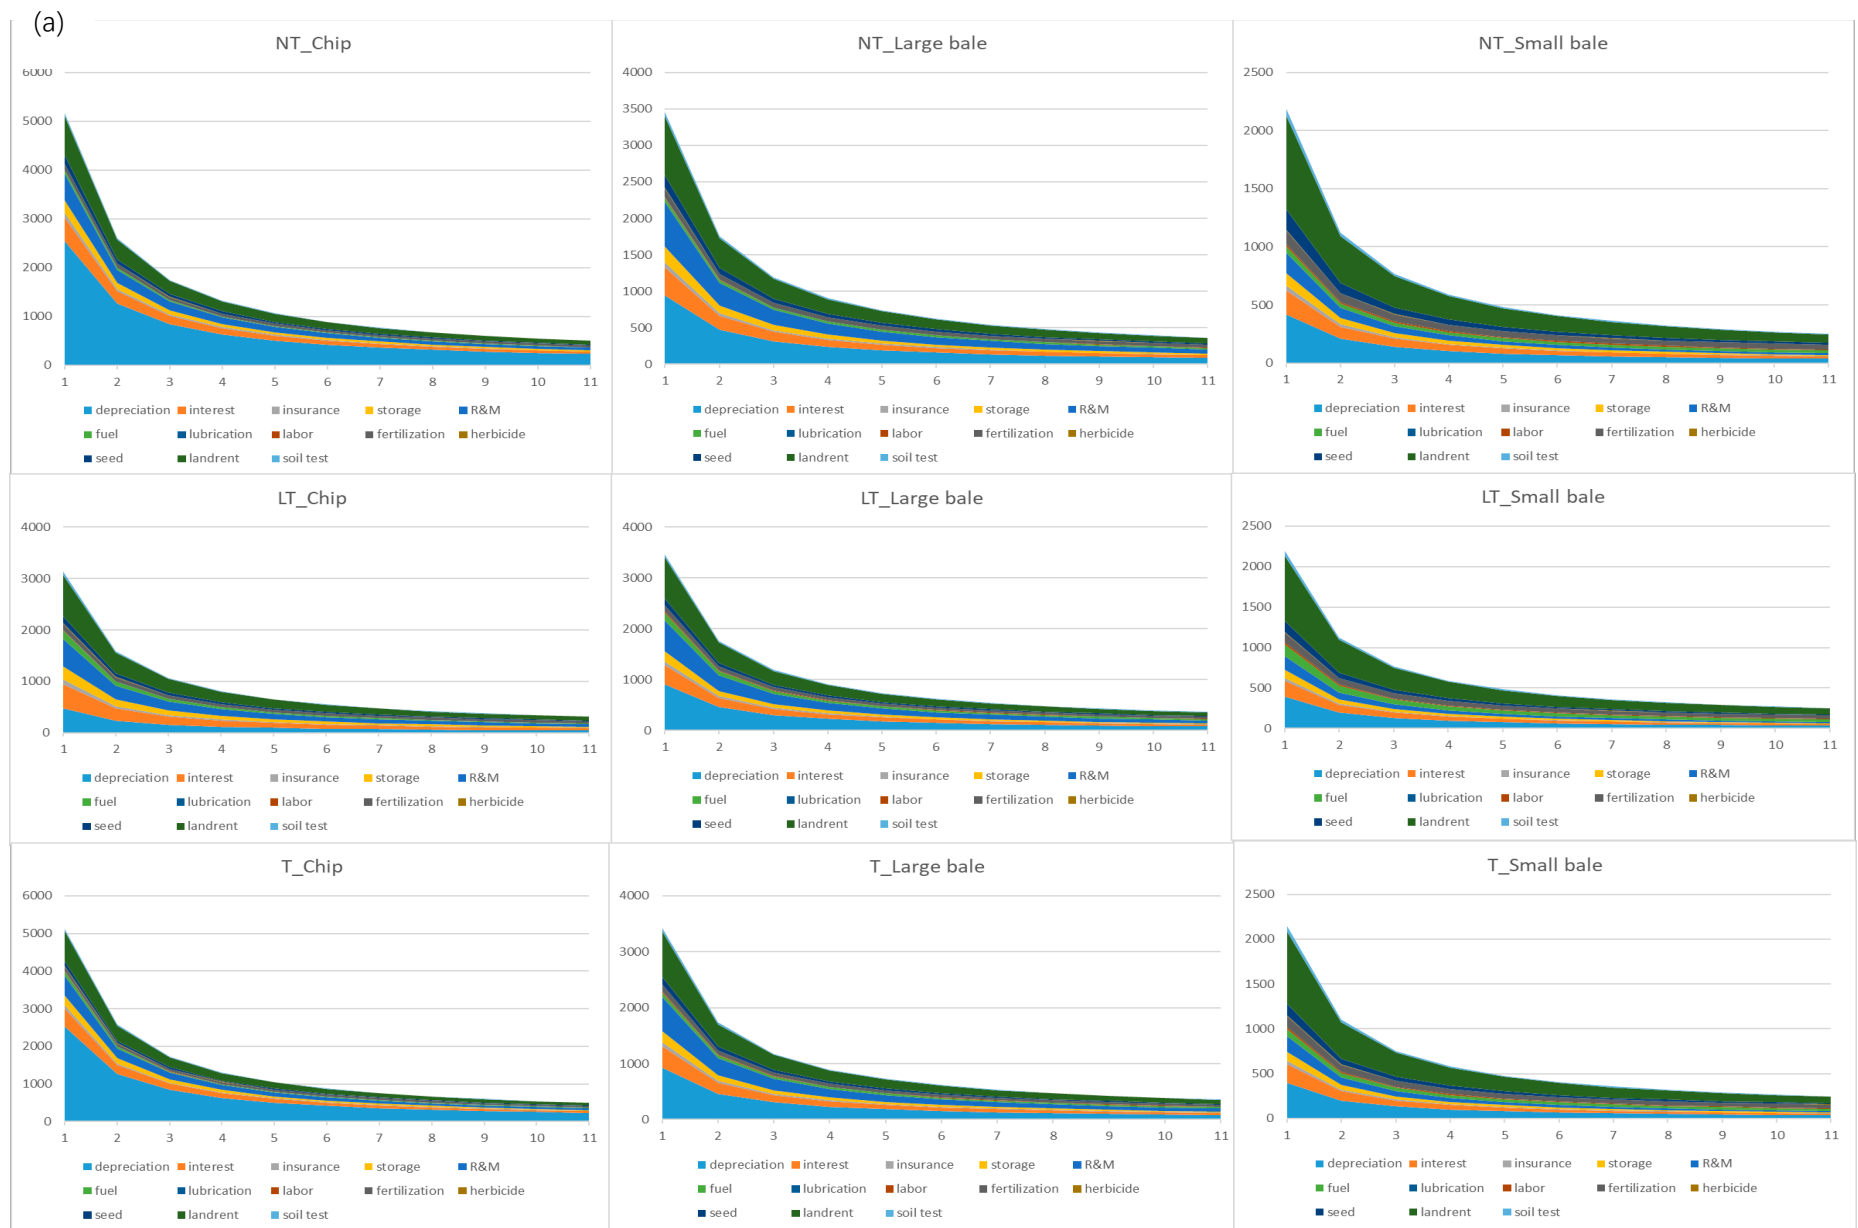

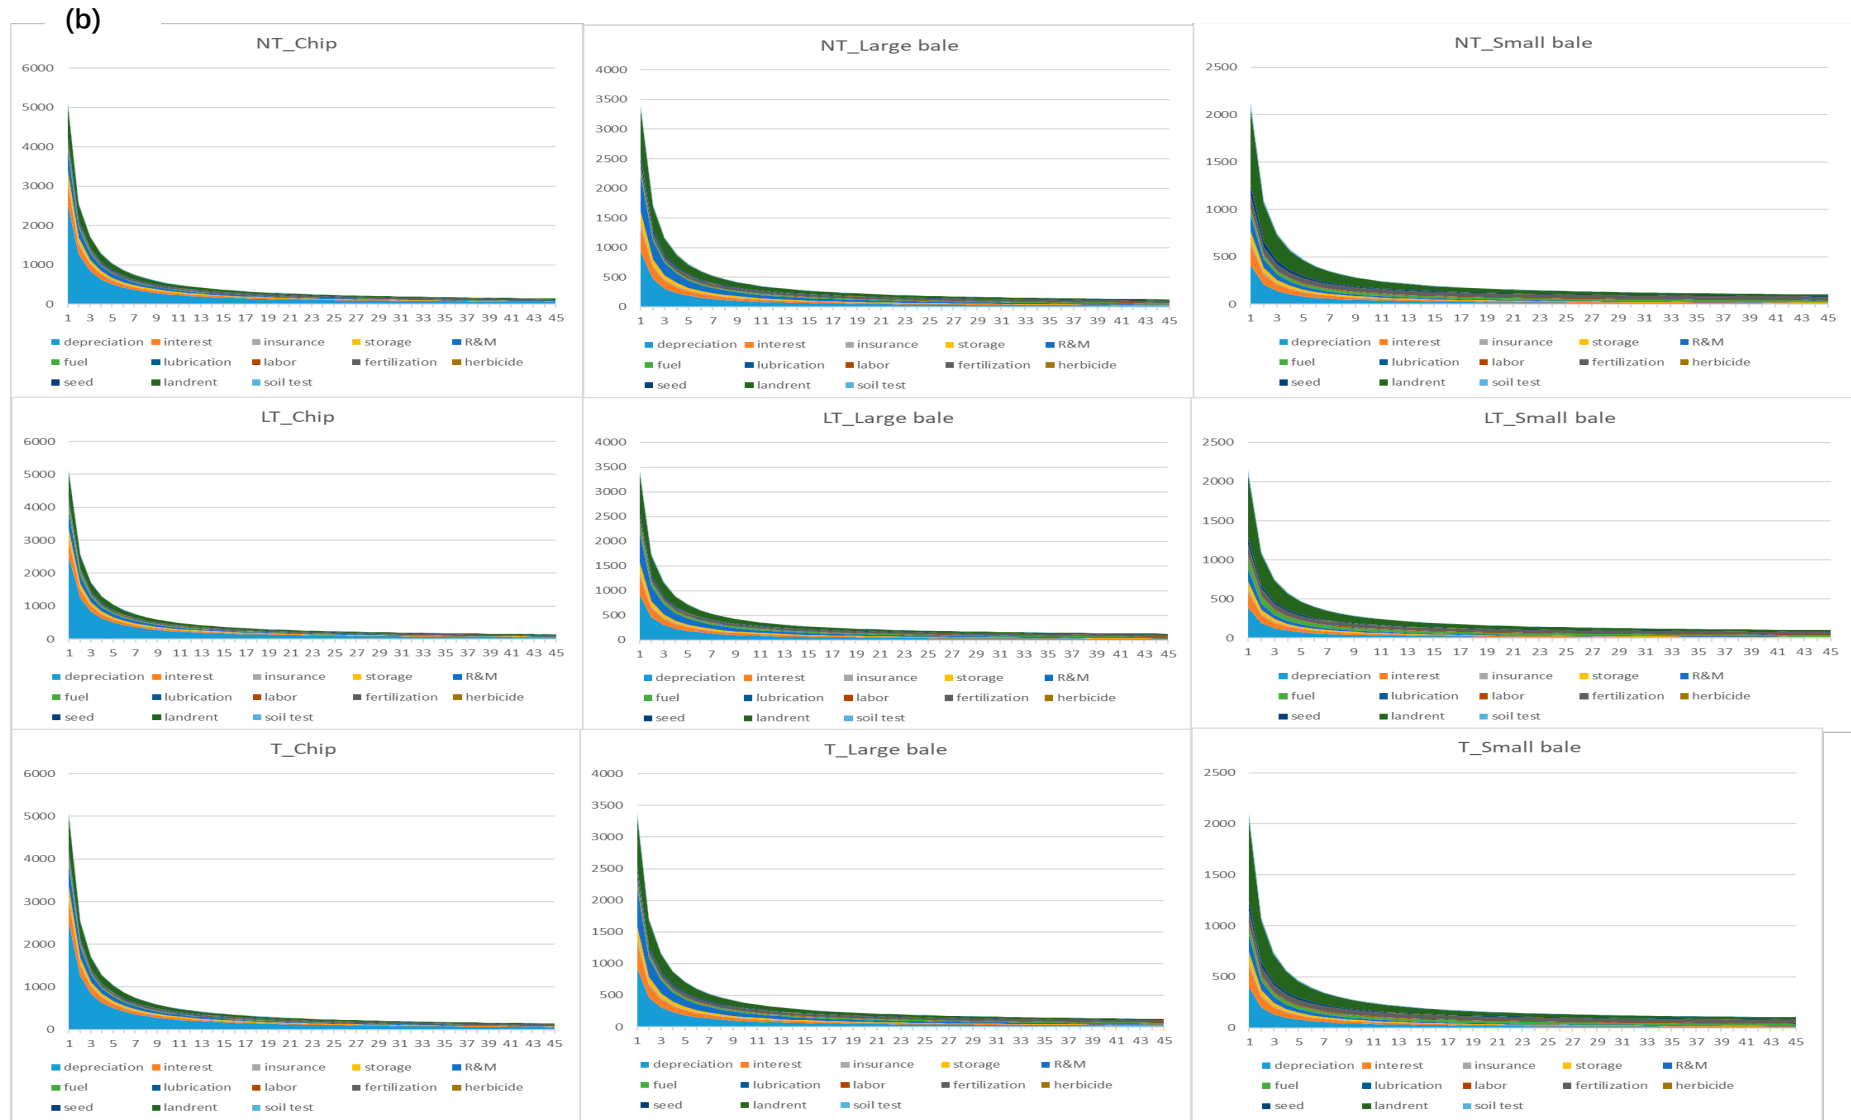

**Figure S7.** The cost breakdown of the switchgrass feedstock production cost. (a)Upland switchgrass; (b) Lowland switchgrass.

| Cultivation method | Harvest method | Energy supply (PJ ·year <sup>-1</sup> ) | Percentage (%) | Area (Mha) | Energy supply (PJ ·year <sup>-1</sup> ) | Percentage (%) | Area (Mha) |
|--------------------|----------------|-----------------------------------------|----------------|------------|-----------------------------------------|----------------|------------|
|                    |                | Thermal coal 2.0- 4.0 USD/GJ            |                |            |                                         |                |            |
|                    |                | 13 CHY/GJ                               |                |            | 26 CHY/GJ                               |                |            |
| T                  | Small bale     | 945.6                                   | 49             | 2.0        | 1372.2                                  | 71             | 5.9        |
| RT                 | Small bale     | 944.6                                   | 49             | 2.0        | 1351.1                                  | 70             | 5.7        |
| NT                 | Small bale     | 945.1                                   | 49             | 2.0        | 1354.7                                  | 70             | 5.8        |
| T                  | Large bale     | 809.5                                   | 42             | 1.5        | 1010.9                                  | 52             | 2.4        |
| RT                 | Large bale     | 808.6                                   | 42             | 1.5        | 1010.0                                  | 52             | 2.4        |
| NT                 | Large bale     | 809.2                                   | 42             | 1.5        | 1010.1                                  | 52             | 2.4        |
| T                  | Chip           | 633.1                                   | 33             | 1.1        | 944.8                                   | 49             | 2.0        |
| RT                 | Chip           | 629.8                                   | 33             | 1.1        | 944.7                                   | 49             | 2.0        |
| NT                 | Chip           | 630.8                                   | 31             | 1.1        | 944.8                                   | 49             | 2.0        |
|                    |                | Natural gas 2.2- 6.0 USD/GJ             |                |            |                                         |                |            |
|                    |                | 14 CHY/GJ                               |                |            | 38 CHY/GJ                               |                |            |
| T                  | Small bale     | 971                                     | 50             | 2.1        | 1740                                    | 90             | 11.0       |
| RT                 | Small bale     | 971                                     | 50             | 2.1        | 1735                                    | 90             | 10.9       |
| NT                 | Small bale     | 970                                     | 50             | 2.1        | 1736                                    | 90             | 11.0       |
| T                  | Large bale     | 856                                     | 44             | 1.7        | 1387                                    | 72             | 6.1        |
| RT                 | Large bale     | 856                                     | 44             | 1.7        | 1382                                    | 72             | 6.0        |
| NT                 | Large bale     | 855                                     | 44             | 1.7        | 1382                                    | 72             | 6.0        |
| T                  | Chip           | 724                                     | 38             | 1.3        | 1016                                    | 53             | 2.4        |
| RT                 | Chip           | 704                                     | 38             | 1.2        | 1015                                    | 53             | 2.4        |
| NT                 | Chip           | 704                                     | 37             | 1.2        | 1015                                    | 53             | 2.4        |
|                    |                | Crude oil 7.7-13.6 USD/GJ               |                |            |                                         |                |            |
|                    |                | 50 CHY/GJ                               |                |            | 87 CHY/GJ                               |                |            |

|    |            |            |    |      |           |    |      |
|----|------------|------------|----|------|-----------|----|------|
| T  | Small bale | 1803       | 94 | 11.9 | 1898      | 98 | 14.3 |
| RT | Small bale | 1797       | 93 | 11.8 | 1897      | 98 | 14.3 |
| NT | Small bale | 1798       | 93 | 11.8 | 1897      | 98 | 14.3 |
| T  | Large bale | 1630       | 85 | 9.1  | 1830      | 95 | 12.4 |
| RT | Large bale | 1629       | 85 | 9.1  | 1827      | 95 | 12.4 |
| NT | Large bale | 1629       | 85 | 9.1  | 1827      | 95 | 12.4 |
| T  | Chip       | 1188       | 62 | 3.9  | 1700      | 88 | 10.0 |
| RT | Chip       | 1187       | 62 | 3.9  | 1697      | 88 | 10.0 |
| NT | Chip       | 1187       | 60 | 3.9  | 1697      | 88 | 10.0 |
|    |            | Straw bale |    |      |           |    |      |
|    |            | 22 CHY/GJ  |    |      | 28 CHY/GJ |    |      |
| T  | Small bale | 1179       | 61 | 3.9  | 1410      | 73 | 6.3  |
| RT | Small bale | 1178       | 61 | 3.8  | 1405      | 73 | 6.2  |
| NT | Small bale | 1178       | 61 | 3.9  | 1405      | 73 | 6.2  |
| T  | Large bale | 995        | 52 | 2.3  | 1047      | 54 | 2.6  |
| RT | Large bale | 982        | 51 | 2.3  | 1047      | 54 | 2.4  |
| NT | Large bale | 994        | 52 | 2.3  | 1047      | 54 | 2.4  |
|    |            | Straw chip |    |      |           |    |      |
|    |            | 22 CHY/GJ  |    |      | 56 CHY/GJ |    |      |
| T  | Chip       | 904        |    | 1.8  | 964       | 50 | 3.9  |
| RT | Chip       | 904        |    | 1.8  | 963       | 50 | 3.9  |
| NT | Chip       | 904        |    | 1.8  | 963       | 50 | 3.9  |

**Table S1.** The energy supply on the marginal land of the Loess plateau

#### Reference

- [1] Y. Liu, A. Hasting, S. Chen, B. Xu, and A. P. C. Faaij, "SwitchFor: a new crop growth model for yield mapping of switchgrass," *GCB Bioenergy*, 2022.
